# Supplementary material for: Gene Expression Changes in Long-Term In Vitro Human Blood-Brain Barrier Models and Their Dependence on a Transwell Scaffold Material
Source: PubMed Central journal article supplement (PMC5727720; doi:10.1155/2017/5740975), 2017-11-29
Supplement: 5740975.f1.pdf [file 5740975.f1.pdf]

| Time point | Sample ID | Gene target | Ct           |
|------------|-----------|-------------|--------------|
| Day 3      | PET-1     | AQP         | 26.890       |
| Day 3      | PET-2     | AQP         | 26.242       |
| Day 3      | PET-3     | AQP         | 29.431       |
| Day 3      | PET-4     | AQP         | Undetermined |
| Day 3      | PET-5     | AQP         | 28.018       |
| Day 3      | PET-6     | AQP         | 25.643       |
| Day 3      | PET-1     | GFAP        | 24.457       |
| Day 3      | PET-2     | GFAP        | 22.673       |
| Day 3      | PET-3     | GFAP        | 25.393       |
| Day 3      | PET-4     | GFAP        | 32.599       |
| Day 3      | PET-5     | GFAP        | 24.892       |
| Day 3      | PET-6     | GFAP        | 23.415       |
| Day 7      | BP-1      | GFAP        | Undetermined |
| Day 7      | BP-2      | GFAP        | Undetermined |
| Day 7      | BP-3      | GFAP        | 25.533       |
| Day 7      | BP-4      | GFAP        | 28.843       |
| Day 7      | BP-5      | GFAP        | 23.216       |
| Day 7      | BP-6      | GFAP        | 25.083       |
| Day 7      | PET-1     | GFAP        | Undetermined |
| Day 7      | PET-2     | GFAP        | Undetermined |
| Day 7      | PET-3     | GFAP        | 23.146       |
| Day 7      | PET-4     | GFAP        | 23.262       |
| Day 7      | PET-5     | GFAP        | 23.386       |
| Day 7      | PET-6     | GFAP        | 24.292       |
| Day 7      | BP-1      | AQP4        | Undetermined |
| Day 7      | BP-2      | AQP4        | Undetermined |
| Day 7      | BP-3      | AQP4        | 30.653       |
| Day 7      | BP-4      | AQP4        | 30.291       |
| Day 7      | BP-5      | AQP4        | 23.342       |
| Day 7      | BP-6      | AQP4        | 26.972       |
| Day 7      | PET-1     | AQP4        | Undetermined |
| Day 7      | PET-2     | AQP4        | 31.232       |
| Day 7      | PET-3     | AQP4        | 24.729       |
| Day 7      | PET-4     | AQP4        | 24.585       |
| Day 7      | PET-5     | AQP4        | 26.218       |
| Day 7      | PET-6     | AQP4        | 25.785       |

Table S1. Absent gene expression in 4 samples for both AQP4 and GFAP. The highlighted samples were removed from all analyses.
